# Supplementary material for: Alcohol Septal Ablation versus Septal Myectomy Treatment of Obstructive Hypertrophic Cardiomyopathy: A Systematic Review and Meta-Analysis
Source: MDPI journal article supplement (doi:10.3390/jcm9103062), 2020-09-23

## Supplementary data

**Table 1.** Main characteristics of studies included in the study.

| Study year         | Study design         | Country            | Sample size | Key endpoints                                          | Secondary end-points                          | Follow-up (months) |
|--------------------|----------------------|--------------------|-------------|--------------------------------------------------------|-----------------------------------------------|--------------------|
| Qin 2001           | Prospective cohort   | USA<br>Cleveland   | 51          | PC, PD                                                 | LVOTO, IVSd<br>LVEDD, LA                      | 3                  |
| Firoozi 2002       | Prospective cohort   | UK                 | 44          | All-cause mortality<br>SCD, CV mortality<br>PC         | NYHA, Angina<br>LVOTO, LVEDD<br>LA size       | 32.2               |
| Jing 2004          | Prospective cohort   | China              | 54          | All-cause mortality                                    |                                               | 24                 |
| Ralph-Edwards 2005 | Prospective cohort   | Canada             | 102         | All-cause mortality<br>SCD, CV mortality               | LVEDD, IVSd<br>LA size                        | 24.3               |
| Vural 2007         | Prospective cohort   | Turkey             | 40          | All-cause mortality<br>Reintervention<br>PC            | NYHA, Angina<br>LVOTO, LVEDD<br>IVSd, LA size | 13.12              |
| Ball 2011          | Prospective cohort   | Canada             | 372         | All-cause mortality                                    | IVSd, LA size                                 | 60                 |
| Sorajja 2012       | Retrospective cohort | USA<br>Mayo Clinic | 354         | All-cause mortality<br>SCD, CV mortality<br>PC, Stroke | Angina, LVOTO<br>LVEDD, LA size               | 68.4               |
| Knyshev 2013       | Prospective cohort   | Ukraine            | 42          | All-cause mortality                                    | LVOTO, NYHA                                   | 31.9               |

|                  |                    |                       |     |                                                                 |                                         |      |
|------------------|--------------------|-----------------------|-----|-----------------------------------------------------------------|-----------------------------------------|------|
| Steggerda 2014   | Prospective cohort | Netherlands           | 263 | All-cause mortality<br>SCD, CV mortality<br>Reintervention, PCI | IVSd                                    | 60   |
| Samardhi 2014    | Prospective cohort | Australia             | 70  | All-cause mortality<br>Reintervention<br>PC, PD                 | NYHA, Angina<br>LVOTO, IVSd<br>LA size  | 43   |
| Vriesendorp 2014 | Prospective cohort | Netherlands & Belgium | 574 | All-cause mortality<br>SCD, CV mortality<br>PC                  | LVOTO, IVSd                             | 91.2 |
| Sedehi 2015      | Prospective cohort | USA<br>Stanford       | 223 | All-cause mortality<br>PD                                       | NYHA<br>LVOTO, IVSd                     | 120  |
| Yang 2016        | Prospective cohort | China                 | 59  | All-cause mortality<br>SCD, CV mortality<br>Reintervention      | Angina, LVOTO<br>LVEDD, IVSd<br>LA size | 36   |
| Finocchiaro 2016 | RCTs               | USA<br>Stanford       | 40  |                                                                 | LVOTO, IVSd<br>LVEDD, LA size           | 12   |
| Cavigli 2018     | Prospective cohort | Italy                 | 126 | All-cause mortality<br>SCD, CV mortality<br>Reintervention, PD  | Angina<br>LVOTO, IVSd<br>LA size        | 60   |
| Guo 2018         | RCTs               | China                 | 226 | All-cause mortality<br>Reintervention, PD<br>PC                 | Angina<br>LVOTO, IVSd<br>LA size        | 41.2 |
| Hoedemakers 2019 | Retrospective      | Belgium               | 77  | All-cause mortality<br>SCD, CV mortality<br>PD                  | LVOTO, IVSd<br>LA size                  | 84   |

|                  |                    |                              |     |                                           |                        |      |
|------------------|--------------------|------------------------------|-----|-------------------------------------------|------------------------|------|
| Nguyen 2019      | Prospective cohort | USA                          | 503 | All-cause mortality<br>PC, Reintervention | LVOTO, IVSd<br>LA size | 31.2 |
| Kimmelstiel 2019 | Prospective cohort | USA<br>Boston                | 477 | All-cause mortality<br>PC, Reintervention | LVOT, IVSd             | 48   |
| Shimada 2019     | Prospective cohort | USA<br>California<br>Florida | 850 |                                           | PC, PP                 | 76.8 |

Abbreviation: CV: cardio-vascular; SCD: sudden cardiac death; PC: peri-procedural complication; PD: pacemaker dependence; LVOTO: left ventricle outflow tract obstruction; IVSd: interventricular septal in diastole; LA: left atrium; LVEDD: left ventricle end-diastolic dimension.

**Table S2. Main characteristics of patients enrolled among trials included in the study**

| Study (year)       | Arms of treatment | Number of patients | Age (year) | Female (%) | Mean hospital Stay (days) | LVOTO mmHg | NYHA class (mean) |
|--------------------|-------------------|--------------------|------------|------------|---------------------------|------------|-------------------|
| Qin 2001           | ASA               | 25                 | 63 ± 14    | 72         | 5.6 ± 2.3                 | 64 ± 39    | 3.5 ± 0.5         |
|                    | SM                | 26                 | 48 ± 13    | 39         | 8.1 ± 3.5                 | 62 ± 43    | 3.3 ± 0.5         |
| Firoozi 2002       | ASA               | 20                 | 49 ± 13    | 40         | NR                        | 83 ± 23    | 2.3 ± 0.5         |
|                    | SM                | 24                 | 38 ± 16    | 46         | NR                        | 91 ± 18    | 2.4 ± 0.6         |
| Jing 2004          | ASA               | 43                 | 36 ± 11    |            | NR                        | NR         | NR                |
|                    | SM                | 11                 | 45 ± 14    |            | NR                        | NR         | NR                |
| Ralph-Edwards 2005 | ASA               | 54                 | 59 ± 15    | 52         | 7 days                    | 74 ± 36    | NR                |
|                    | SM                | 48                 | 46 ± 17    | 38         | 8 days                    | 64 ± 27    | NR                |
| Vural 2007         | ASA               | 24                 | 25 ± 7.3   | 42         | 4.3 ± 0.9                 | 65 ± 60    | NR                |
|                    | SM                | 16                 | 24 ± 6.6   | 44         | 6.5 ± 1.8                 | 72.5 ± 20  | NR                |

|                  |     |     |               |      |           |               |             |
|------------------|-----|-----|---------------|------|-----------|---------------|-------------|
| Ball 2011        | ASA | 85  | 57 ± 16       | 50   | NR        | NR            | NR          |
|                  | SM  | 287 | 47 ± 15       | 40   | NR        | NR            | NR          |
| Sorajja 2012     | ASA | 177 | 63 ± 13       | 58   | NR        | 70 ± 40.      | NR          |
|                  | SM  | 177 | 62 ± 12       | 58   | NR        | 67 ± 40.      | NR          |
| Knyshov 2013     | ASA | 14  | 34 ± 8.5      | 43   | NR        | 97.5 ± 8.9    | 2.14 ± 0.53 |
|                  | SM  | 28  | 29.1 ± 16.1   | 54   | NR        | 113.3 ± 14.9  | 2 ± 0.86    |
| Steggerda 2014   | ASA | 161 | 59 ± 14       | 48   | 5 ± 3     | NR            | NR          |
|                  | SM  | 102 | 56 ± 16       | 54   | 9 ± 6     | NR            | NR          |
| Samardhi 2014    | ASA | 47  | 57 ± 14.7     | 45   | NR        | 74.0 ± 20     | NR          |
|                  | SM  | 23  | 47 ± 20.6     | 56.5 | NR        | 75.5 ± 18     | NR          |
| Vriesendorp 2014 | ASA | 321 | 58 ± 14       | 45   | NR        | 102 ± 52      | NR          |
|                  | SM  | 253 | 52 ± 16       | 46   | NR        | 92 ± 39       | NR          |
| Sedehi 2015      | ASA | 52  | 57.3 ± 12.9   | 44   | NR        | 67.1 ± 26.9   | 2.99 ± 0.35 |
|                  | SM  | 171 | 48.0 ± 17.1   | 51   | NR        | 67.4 ± 43.4   | 2.74 ± 0.65 |
| <hr/>            |     |     |               |      |           |               |             |
| Yang 2016        | ASA | 22  | 45.5 ± 8.1    | 20   | NR        | 79.7 ± 21.2   | NR          |
|                  | SM  | 37  | 44.6 ± 9.5    | 33   | NR        | 69.0 ± 23.9   | NR          |
| Finocchiaro 2016 | ASA | 9   | 54 ± 14       | 45   | NR        | 48 ± 32       | NR          |
|                  | SM  | 31  | 50 ± 12       | 42   | NR        | 59 ± 32       | NR          |
| Cavigli 2018     | ASA | 55  | 49 ± 14       | 58   | NR        | 70 ± 33       | NR          |
|                  | SM  | 71  | 42 ± 16       | 38   | NR        | 52 ± 31       | NR          |
| Guo 2018         | ASA | 68  | 52.59 ± 10.54 | 37   | NR        | 70.30 ± 44.79 | NR          |
|                  | SM  | 158 | 49.20 ± 12.30 | 51   | NR        | 74.58 ± 45.52 | NR          |
| Hoedemakers 2019 | ASA | 25  | 61.18 ± 20.8  | 68   | 6.0 ± 3   | 45.00 ± 20    | NR          |
|                  | SM  | 52  | 54.49 ± 26.1  | 54   | 3.0 ± 3   | 64.00 ± 30    | NR          |
| Nguyen 2019      | ASA | 167 | 65 ± 14       | 56   | NR        | 65.0 ± 19     | NR          |
|                  | SM  | 334 | 64 ± 13       | 54   | 5.8 ± 5.6 | 60.0 ± 17     | NR          |

|                  |     |     |             |    |           |             |    |
|------------------|-----|-----|-------------|----|-----------|-------------|----|
| Kimmelstiel 2019 | ASA | 99  | 66.3 ± 11.9 | 63 | 6.4 ± 3.3 | 65.7 ± 40.7 | NR |
|                  | SM  | 378 | 52.7 ± 14.7 | 42 | NR        | 58.0 ± 41.8 | NR |
| Shimada 2019     | ASA | 393 | 61 ± 15     | NR | 5.1 ± 2.7 | NR          | NR |
|                  | SM  | 457 | 61 ± 15     | NR | 7.8 ± 4.6 | NR          | NR |

Abbreviations: ASA: Alcohol septal ablation; SM: septal myectomy; LVOTO: left ventricle outflow tract obstruction; NR: non reported

**Table S3.** Assessment of risk of bias in the included studies using Cochrane criteria for CTs

| Study (trial) year | Sequence generation | Allocation concealment | Blinding of participants and personnel | Blinding of outcome assessment | Incomplete outcome data | Selective outcome reporting | Other bias |
|--------------------|---------------------|------------------------|----------------------------------------|--------------------------------|-------------------------|-----------------------------|------------|
| Finocchiaro 2016   | L                   | L                      | U                                      | L                              | L                       | L                           | L          |
| Guo 2018           | L                   | L                      | U                                      | U                              | L                       | L                           | L          |

*Legend: L: low risk of bias; H: high risk of bias; U: unclear risk of bias.*

**Table S4.** Assessment of risk of bias in the included studies using Newcastle-Ottawa Quality Assessment Scale (NOS) for cohort studies.

| Study, year        | Selection |    |    |    | Comparability | Exposure |    |    | Quality |
|--------------------|-----------|----|----|----|---------------|----------|----|----|---------|
|                    | 1         | 2  | 3  | 4  |               | 1        | 2  | 3  |         |
| Qin 2001           | a)        | a) | b) | a) | a)            | b)       | a) | b) | Good    |
| Firoozi 2002       | a)        | a) | a) | a) | b)            | a)       | a) | a) | Good    |
| Jing 2004          | a)        | b) | b) | a) | b)            | a)       | b) | b) | Good    |
| Ralph-Edwards 2005 | a)        | a) | a) | a) | a)            | b)       | a) | b) | Good    |
| Vural 2007         | b)        | a) | b) | b) | a)            | a)       | a) | b) | Good    |
| Ball 2011          | a)        | b) | b) | a) | b)            | b)       | a) | b) | Good    |
| Sorajja 2012       | a)        | a) | a) | a) | a)            | a)       | a) | a) | Good    |
| Knyshev 2013       | b)        | a) | b) | b) | b)            | d)       | b) | a) | Fair    |
| Steggerda 2014     | a)        | a) | b) | b) | a)            | a)       | b) | a) | Good    |
| Samardhi 2014      | b)        | b) | a) | b) | a)            | a)       | b) | b) | Fair    |
| Vriesendorp 2014   | a)        | a) | b) | a) | a)            | a)       | b) | a) | Good    |

|                  |    |    |    |    |    |    |    |    |      |
|------------------|----|----|----|----|----|----|----|----|------|
| Sedehi 2015      | c) | b) | b) | b) | a) | b) | a) | b) | Fair |
| Yang 2016        | b) | a) | b) | b) | b) | b) | a) | b) | Fair |
| Cavigli 2018     | b) | a) | b) | b) | a) | a) | b) | b) | Good |
| Hoedemakers 2019 | a) | b) | a) | a) | b) | a) | b) | a) | Good |
| Nguyen 2019      | b) | b) | a) | a) | a) | a) | b) | b) | Good |
| Kimmelstiel 2019 | b) | b) | a) | a) | b) | a) | b) | b) | Good |
| Shimada 2019     | b) | b) | a) | a) | a) | a) | b) | b) | Good |

Legend: NOS: Selection- 1: a),b) one star, c), d) no star; Selection- 2: a) one star, b, c) no star; Selection- 3: a), b) one star, c), d), e) no star, Selection- 4: a) one star, b) no star;

Comparability: a), b) one star, c) no star; Exposure-1: a),b) one star, c), d), e) no star; Exposure-2: a) one star, b) no star; Exposure-2: a),b) one star, c), d), no star.

**Good quality:** 3 or 4 stars in selection domain AND 1 or 2 stars in comparability domain AND 2 or 3 stars in outcome/exposure domain

**Fair quality:** 2 stars in selection domain AND 1 or 2 stars in comparability domain AND 2 or 3 stars in outcome/exposure domain

**Poor quality:** 0 or 1 star in selection domain OR 0 stars in comparability domain OR 0 or 1 stars in outcome/exposure domain

Figure S1. Flow chart of study section

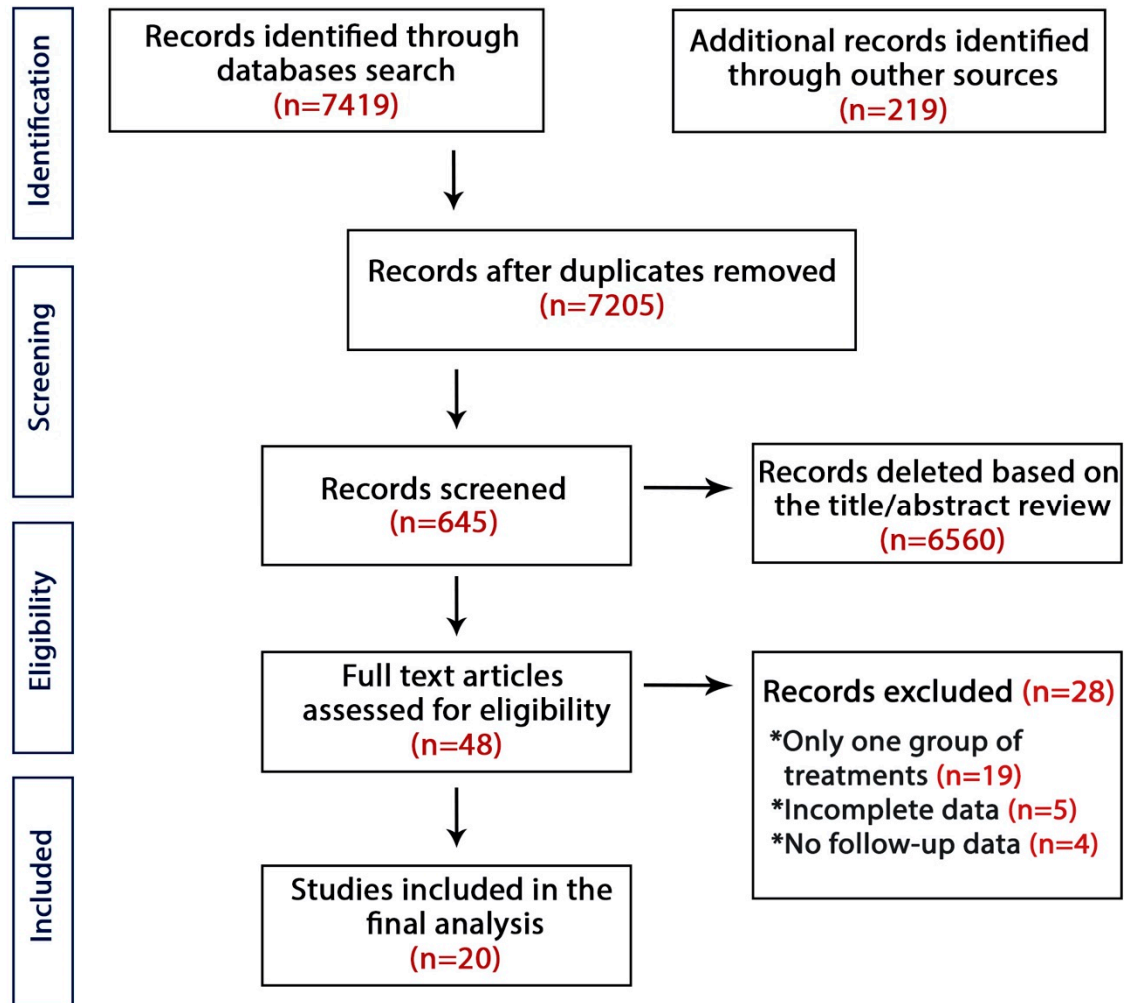

Figure S2. Baseline LV dimensions and function difference: comparison between ASA vs. SM

a) Baseline LVEDD

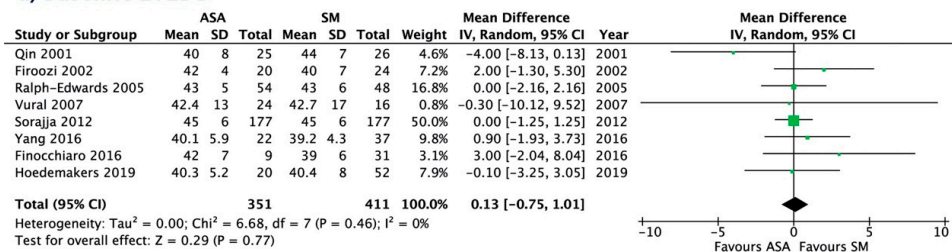

b) Baseline IVSd

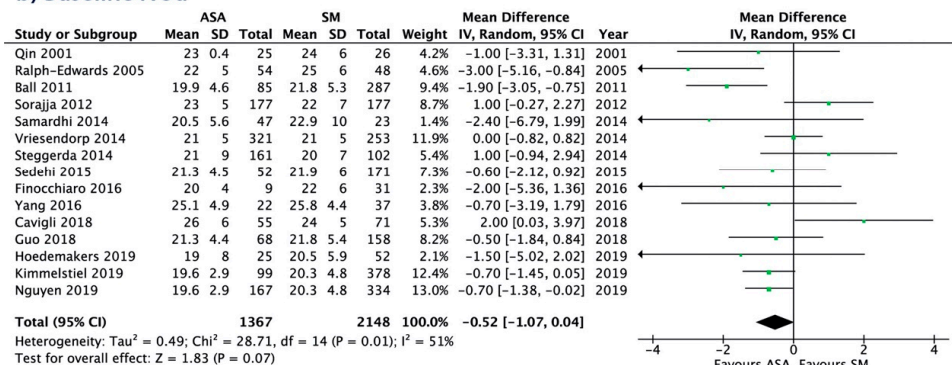

c) Baseline EF

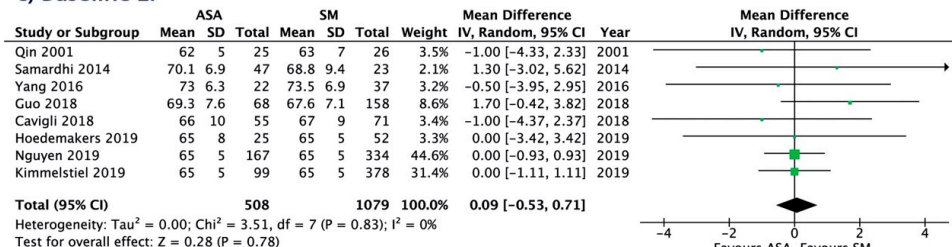

LVEDD: left ventricle end-diastolic dimension; IVSd: interventricular septum in diastole; EF: ejection fraction

Figure S3. Baseline LVOTO, MR & LA size: comparison between ASA vs. SM.

a) Baseline LVOTO

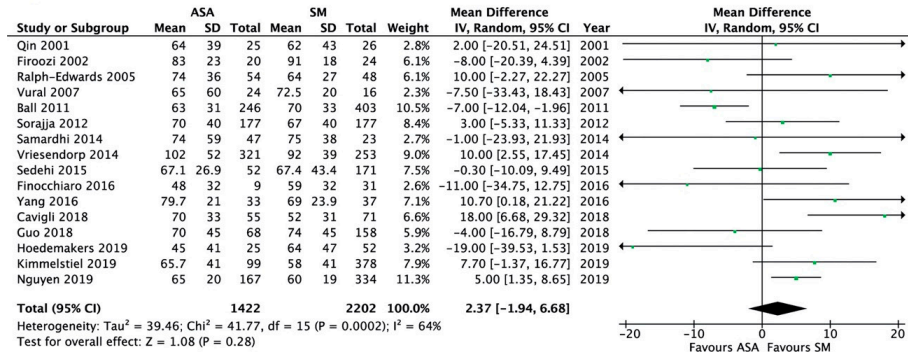

b) Baseline MR

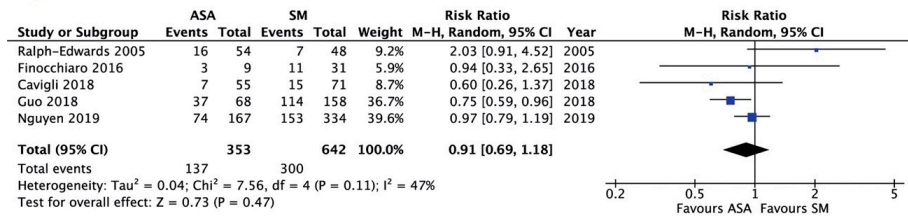

c) Baseline LA size

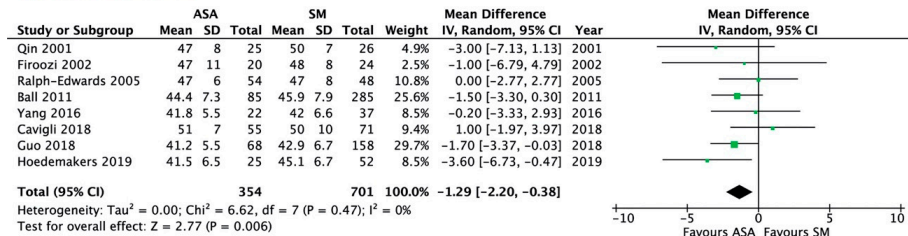

LVOTO: left ventricle outflow tract obstruction; MR: mitral regurgitation; LA: left atrium

Figure S4. NYHA class mean change between ASA vs. SM

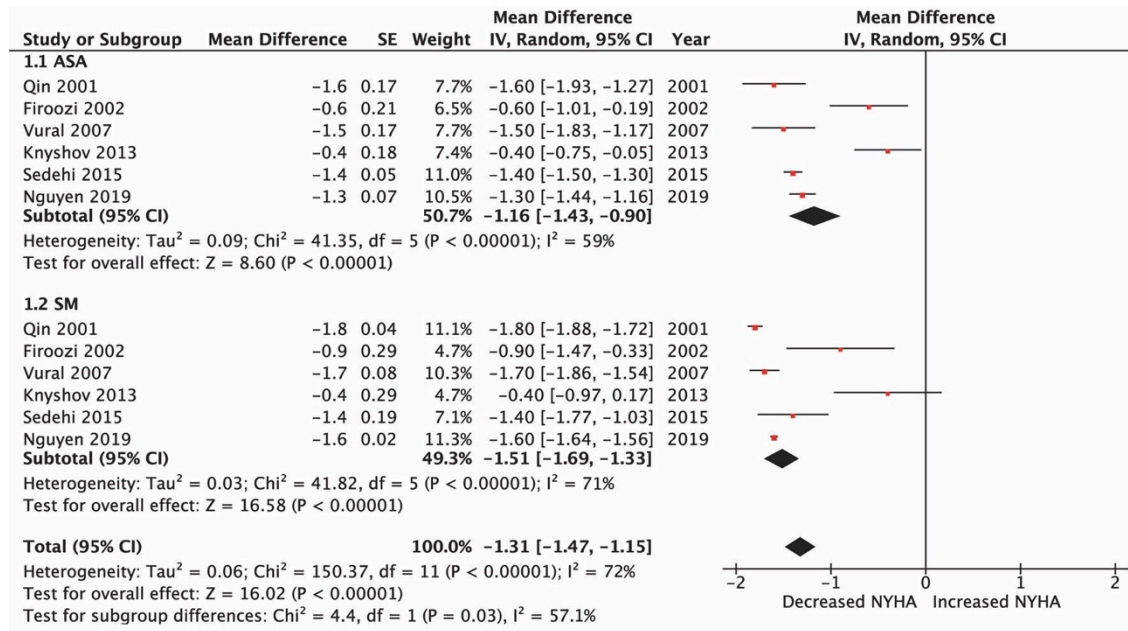

Figure S5. LV dimensions mean change; a) LVEDD; b) IVSd

a) LVEDD mean change; a) ASA group; b) SM group

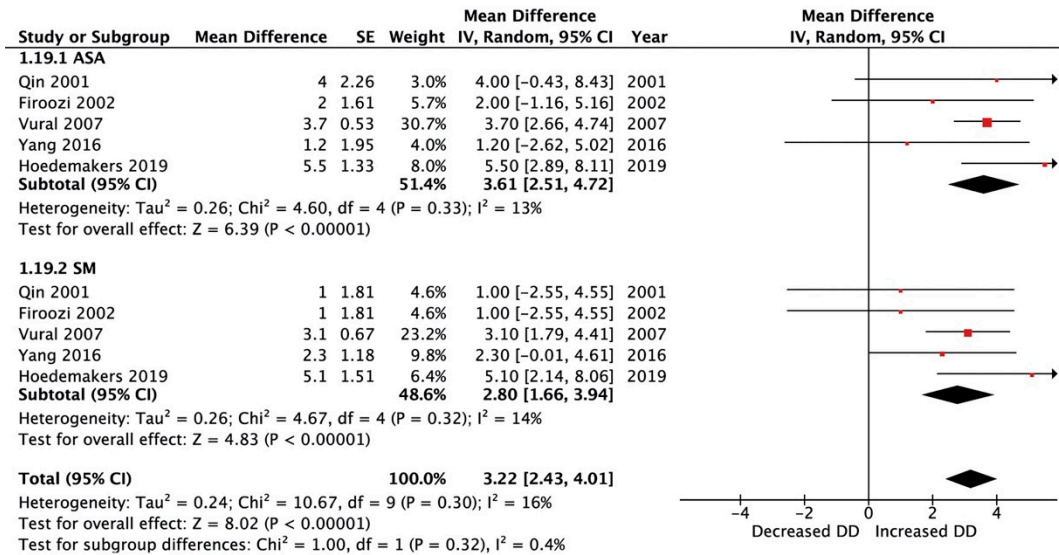

b) IVSd mean change; a) ASA group; b) SM group

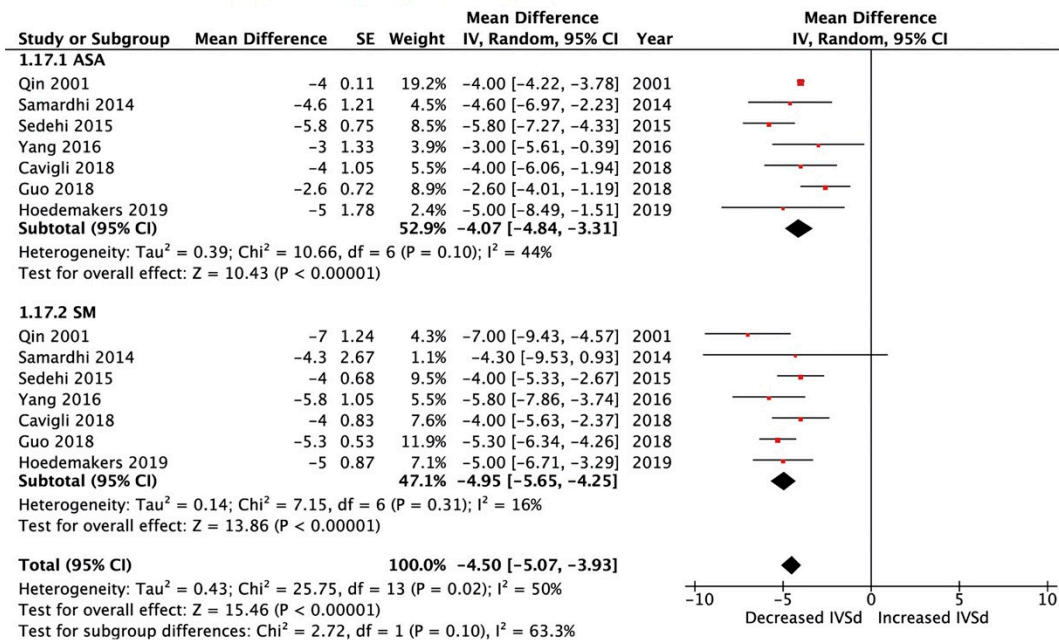

*Figure S6. LV systolic function and LA size mean change; a) LVEF; b) LA size*

a) LVEF mean change; a) ASA group; b) SM group

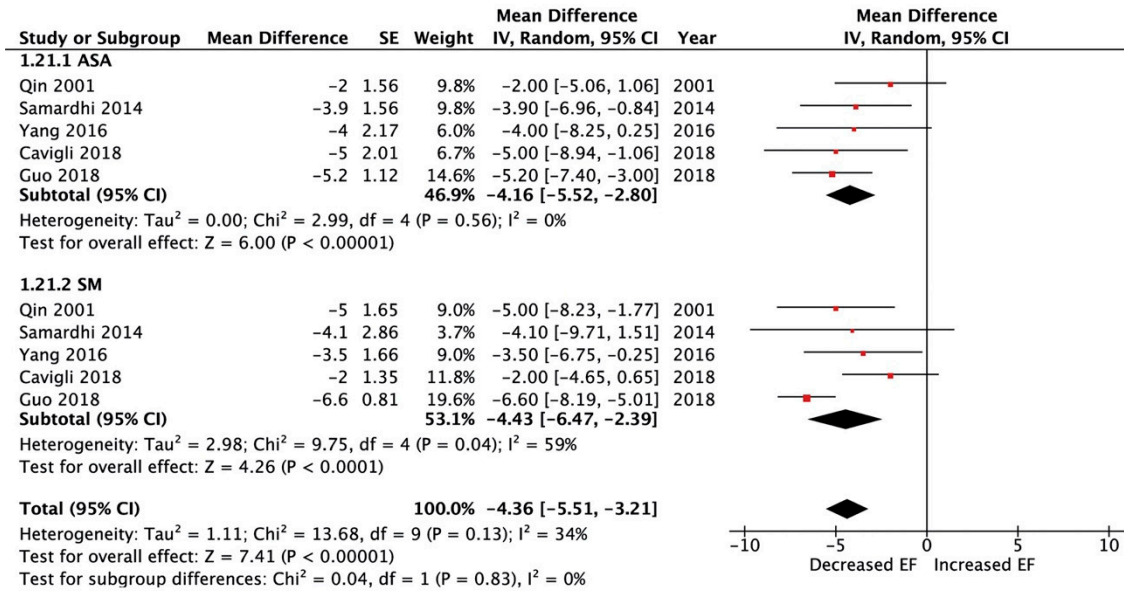

b) LA size mean change; a) ASA group; b) SM group

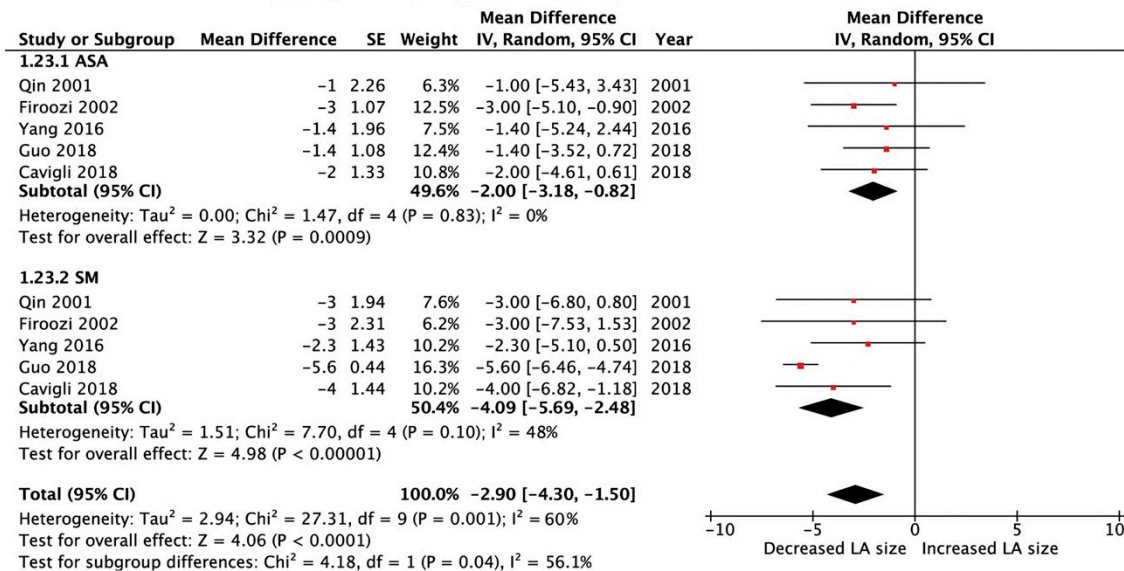

**Figure S7. Meta-regression for interaction of age, female gender, LVOT and IVSd with peri-procedural complications; a) Age; b) Female; c) LVOT mean reduction; d) IVSd mean reduction.**

**A) Interaction of age with peri-procedural complications**

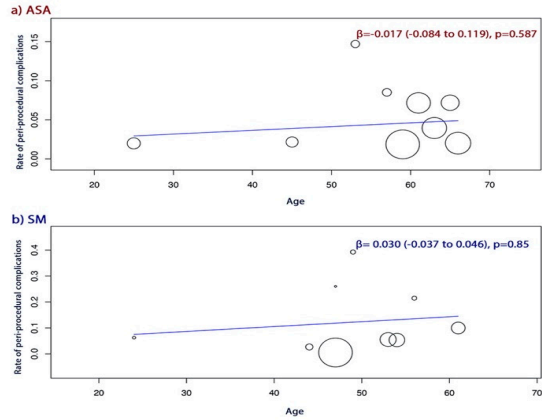

**B) Interaction of female with peri-procedural complications**

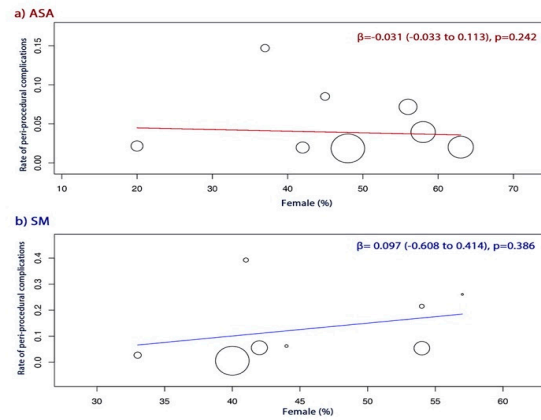

**C) Interaction of LVOT mean reduction with peri-procedural complications**

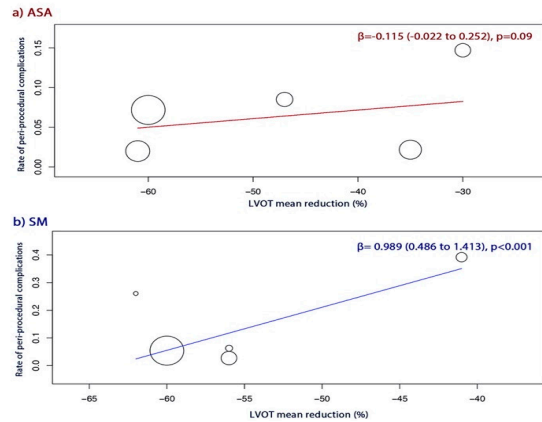

**D) Interaction of IVSd mean reduction with peri-procedural complications**

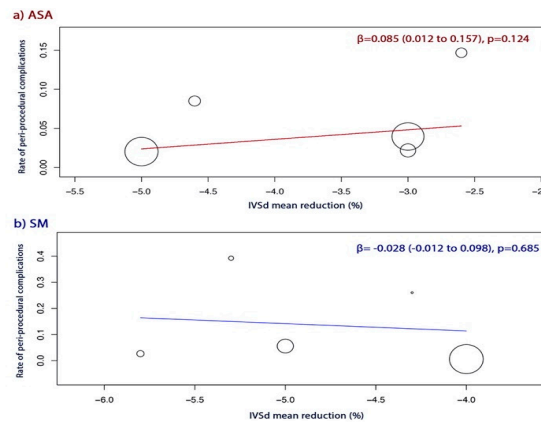

**Figure S8. Meta-regression for interaction of year of publication, follow-up, age and female with all-cause mortality; a) Year of publication; b) follow-up; c) age; d) Female gender**

**A) Interaction of year of publication with all-cause mortality**

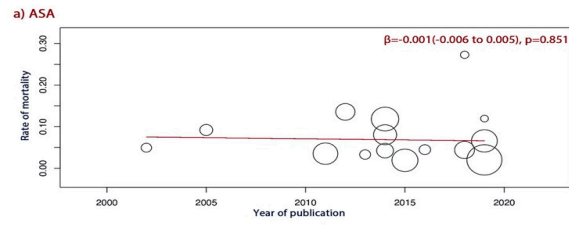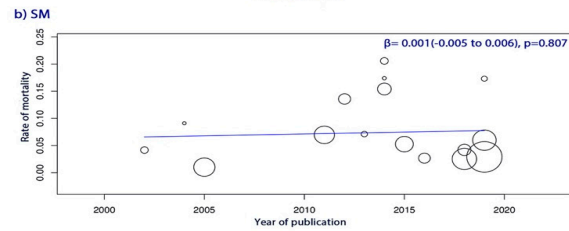

**B) Interaction of follow-up with all-cause mortality**

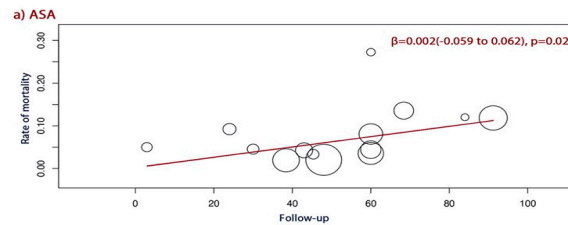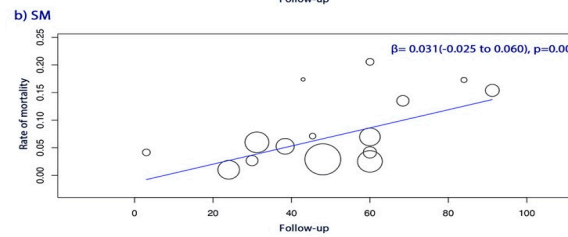

**C) Interaction of age with all-cause mortality**

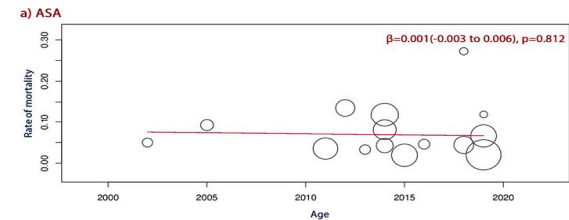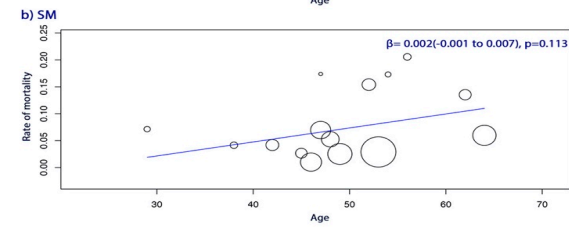

**D) Interaction of gender with all-cause mortality**

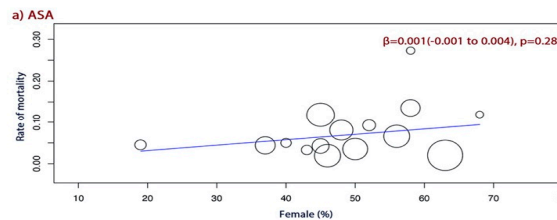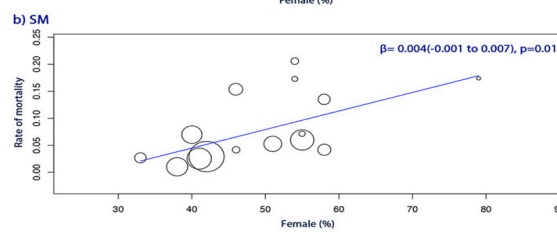

**Figure S9. Meta-regression for interaction of LVOT, IVSd and LA size with all-cause mortality; a) LVOT; b) IVSd; c) LA size;**

**A) Interaction of LVOT with all-cause mortality**

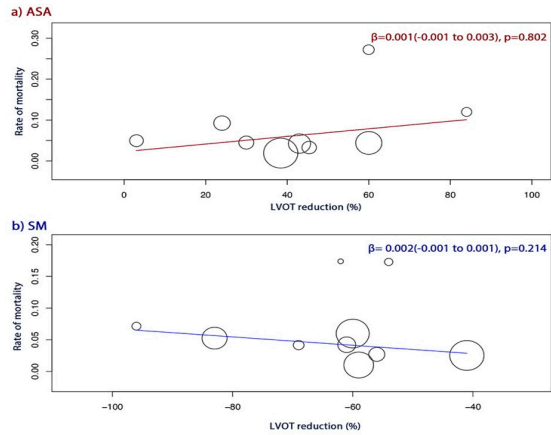

**B) Interaction of IVSd with all-cause mortality**

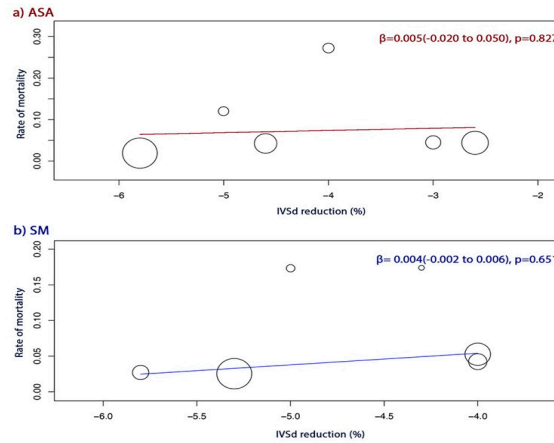

**C) Interaction of LA size with all-cause mortality**

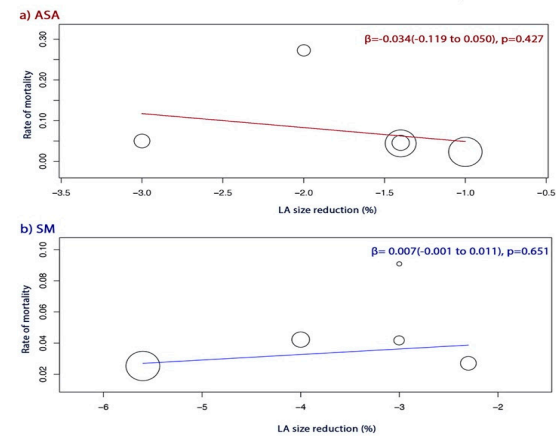

**Figure S10. Meta-regression for interaction of age, female gender, LVOT and IVSd with short-term mortality; a) Age; b) Female; c) LVOT mean reduction; d) IVSd mean reduction.**

**A) Interaction of age with short-term mortality**

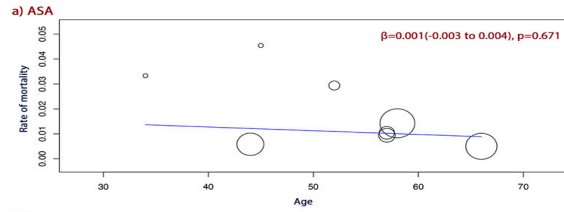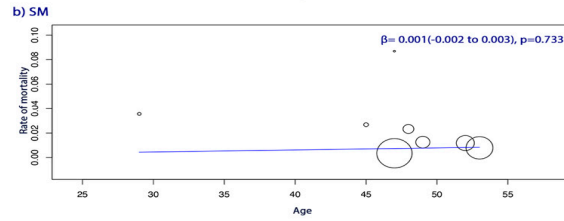

**B) Interaction of female with short-term mortality**

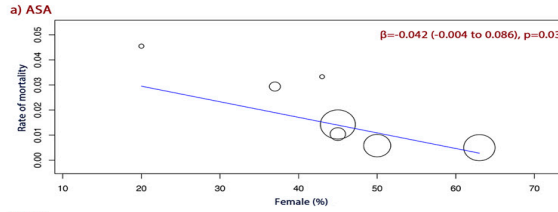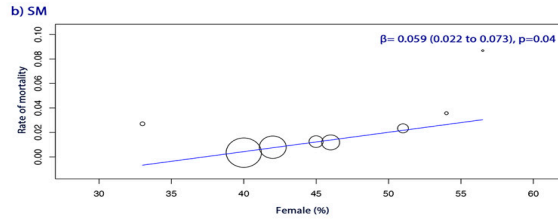

**C) Interaction of LVOT mean reduction with short-term mortality**

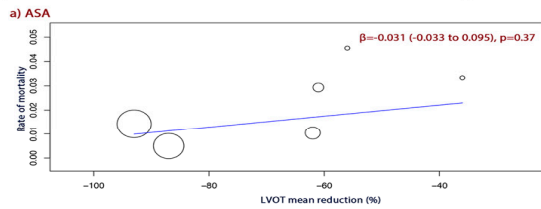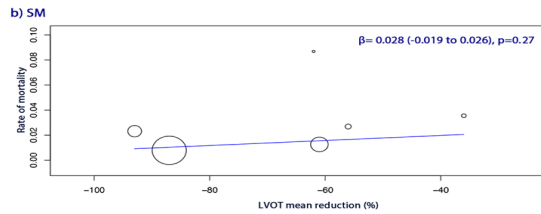

**D) Interaction of IVSd mean reduction with short-term mortality**

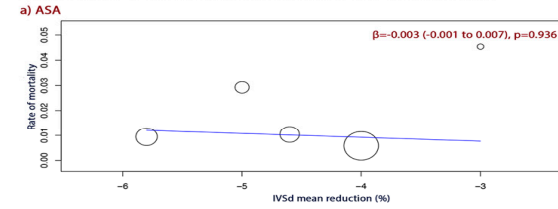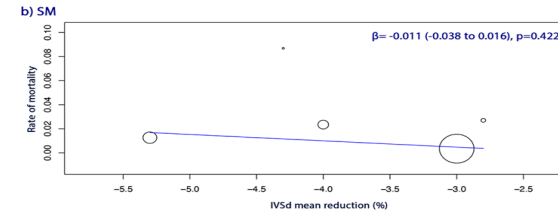

Figure S11. Meta-regression for interaction of age, female gender, LVOT and IVSd with NYHA class; a) Age; b) Female; c) LVOT mean reduction; d) IVSd mean reduction.

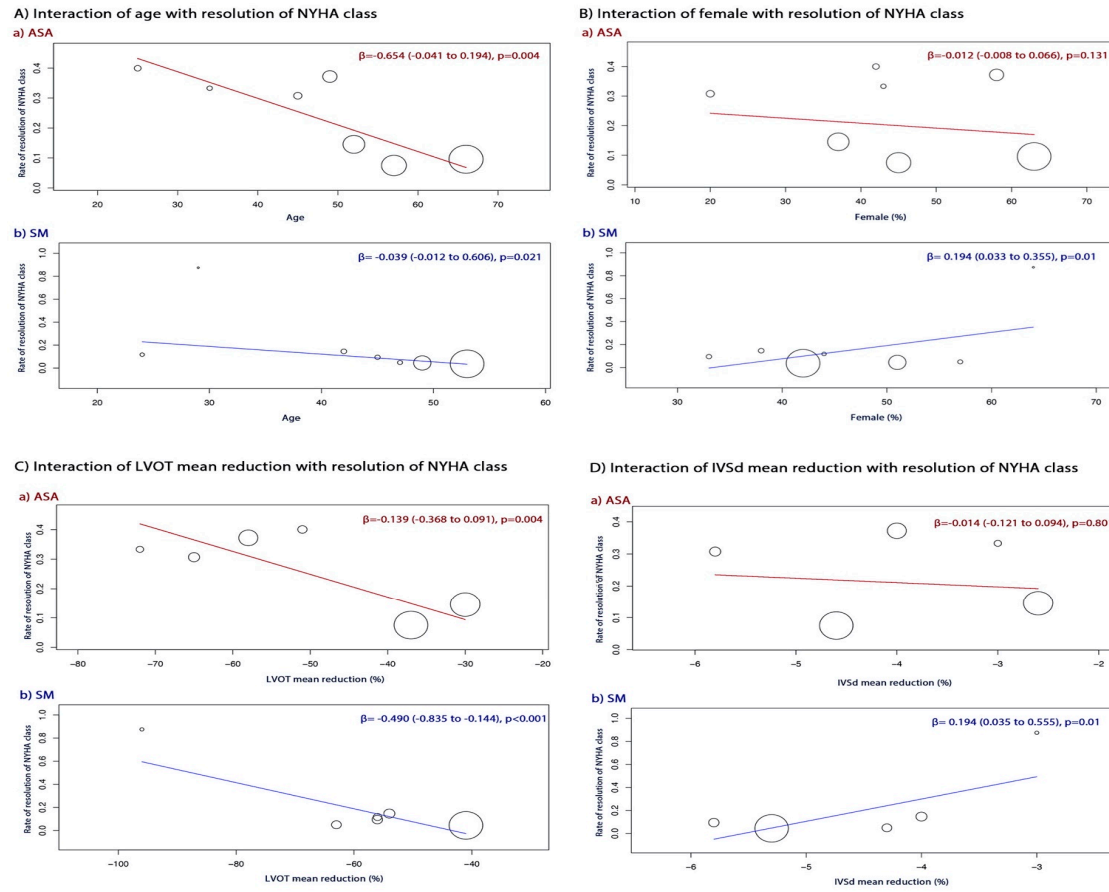

Figure S12. Meta-regression for interaction of year of publication with clinical symptoms A) NYHA class; B) Angina

A) Interaction of year of publication with resolution of NYHA class

a) ASA

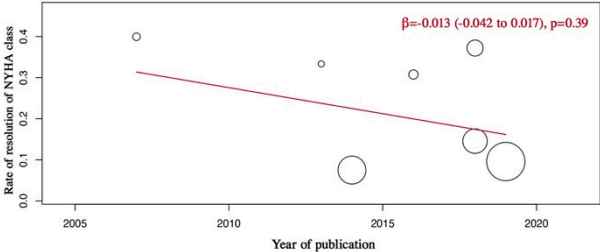

b) SM

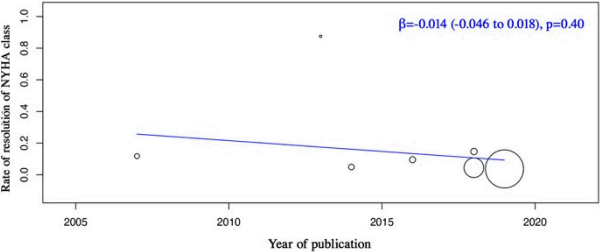

B) Interaction of year of publication with resolution of angina

a) ASA

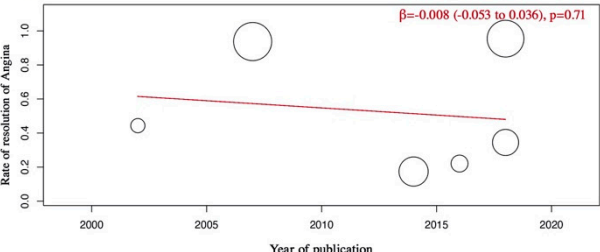

b) SM

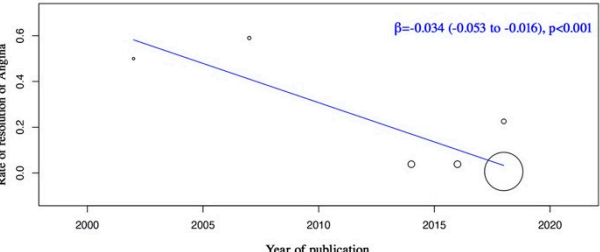

Figure S13. Meta-regression for interaction of age, female gender, LVOT and IVSd with Angina; a) Age; b) Female; c) LVOT mean reduction; d) IVSd mean reduction.

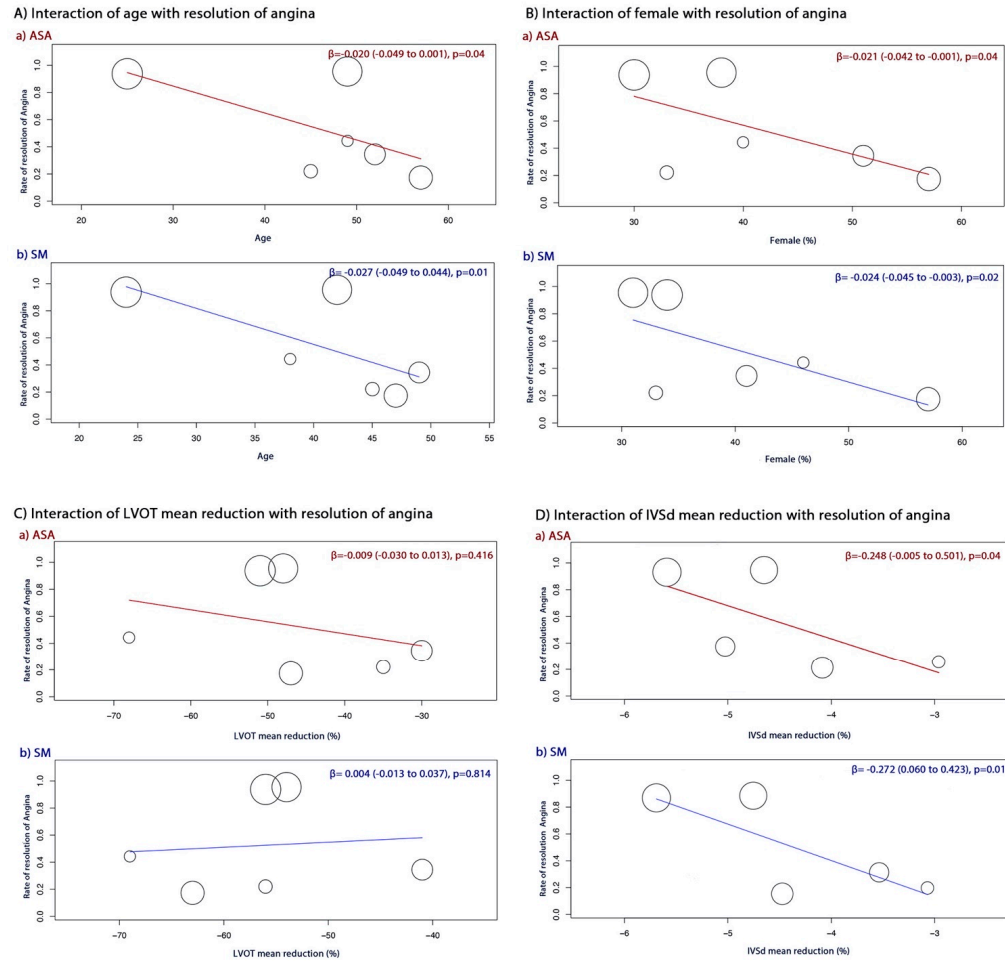

Supplement: s1 [file s1]
